# Supplementary material for: Metabolically activated and highly polyfunctional intratumoral VISTA+ regulatory B cells are associated with tumor recurrence in early-stage NSCLC
Source: Springer Nature journal article supplement (doi:10.1186/s12943-024-02209-2), 2025-01-14
Supplement: MOESM1 [file 12943_2024_2209_MOESM1_ESM.xlsx]

## Sheet: B cells_Phenotype_Figure 1B
sample_id	Tissue	C19	C20	C18	C16	C17	C15	C12	C2	C10	C3	C4	C5	C1	C6	C11	C14	C9	C8	C7	C13
PBMC_B_07	Blood	3.2	0.1	0.4	0.5	0.2	0.4	0.4	0.8	0.4	17.2	36.5	1.1	17.1	2	13	0.7	1.5	2.9	0.2	1.3
PBMC_B_09	Blood	11.2	0.1	0.6	1.3	1.3	5.3	2.4	0.2	0.7	9.3	20	0.9	12.9	1.7	19.1	2.2	1.8	5.3	0.4	3.4
PBMC_B_11	Blood	1.1	0	0.1	0.2	0	0.1	0.5	0.6	0.5	22.6	54.8	0.3	2.4	0.4	11.1	1.2	0.9	2.3	0.1	0.9
PBMC_B_13	Blood	4.2	0.1	0.3	0.2	0.1	0.2	0.1	1.2	0.3	29.3	48.5	0.2	4	0.8	3.9	1	0.4	1.8	0.1	3
PBMC_B_14	Blood	0.3	0	0.1	0.2	0	0.2	0.3	0.5	0.5	7.1	51.1	0.2	5.6	0.9	16.5	7.3	1.1	5.4	0.6	2.2
PBMC_B_16	Blood	0.2	0	0.1	0.1	0.1	0.1	0.2	1.7	0.2	15.3	24.7	4.5	26.9	2.5	5.5	1.8	1.3	9	0.1	5.7
PBMC_B_17	Blood	4	0.1	1.6	0.5	0.1	0.3	0.5	1.7	0.2	9	15.1	3.6	24	1.2	15.5	2.4	0.9	15.9	0.3	3.4
PBMC_B_21	Blood	3.4	0	0.1	0.4	0.1	0.4	0.4	0.9	0.6	24.2	42.6	0.2	4.1	3.7	12	2.2	0.7	2	0.1	2
PBMC_B_22	Blood	0.2	0	0	0.1	0	0.1	0.1	2.4	0.3	24.9	57.9	0.1	3.4	0.4	4.6	1.2	0.8	2.8	0.1	0.7
PBMC_B_23	Blood	0.1	0	0.1	0.2	0	0.1	0.1	0.8	0.3	28.4	51.9	0.8	5.6	2.8	1.7	1.4	0.9	2.6	0.1	2
PBMC_B_24	Blood	0.3	0	0.2	0	0	0	0.1	1.1	0.3	13.3	56.8	0.1	4.1	0.7	9.2	5.5	0.5	3.6	1	2.9
PBMC_B_25	Blood	4.1	0	0.3	0.2	0	0.1	0.5	0.6	0.5	23.5	45.3	0.8	9.9	1	4.4	2	0.9	3.7	0.6	1.7
PBMC_B_27	Blood	0.4	0.1	0.6	0.3	0.2	0.2	0.5	0.7	0.2	5.5	34.3	1.8	17.3	2.9	17.6	4.2	0.9	6.4	1.2	4.8
PBMC_B_28	Blood	1.1	0	1.1	0.1	0	0	0.2	0.8	0.2	13.1	46.7	0.6	22.2	0.9	3.4	2.5	0.5	4.5	0.5	1.5
PBMC_B_29	Blood	0.4	0.1	0.6	0.1	0	0	0.3	0.1	0	1.8	4	2	63.9	2.1	9	2.8	0.5	9.2	0.2	2.9
TIL_B_07	Tumor	0.1	0.7	1.6	0	0.3	0.1	0.2	0	0.3	0.2	6.7	0	17.9	0.4	53.8	9	1.8	5.8	0.2	1
TIL_B_09	Tumor	0	0.4	1.3	2.3	10.3	2.1	0.4	0	0.8	0.9	5	0.2	10.8	0.5	30.7	6.8	4.4	14.2	0.3	8.6
TIL_B_11	Tumor	0.2	6.3	1.1	0.6	0.1	0	0	0	0.3	0.7	13.1	0	12.2	0.2	32.8	9.6	2.6	16.9	0.4	2.8
TIL_B_13	Tumor	0.1	0.6	2.1	0.8	10.1	0	0.1	0	0.1	0.2	3.5	0	3.5	0.4	30.9	34.7	1	4	0.7	7.1
TIL_B_14	Tumor	0.2	6.3	1.1	0.6	0.1	0	0	0	0.3	0.7	13.1	0	12.2	0.2	32.8	9.6	2.6	16.9	0.4	2.8
TIL_B_16	Tumor	0	15.4	22.2	0	0.8	0	0	0	0.3	0.5	2.9	0	14.2	0.3	25.2	4.8	2.7	8	0.8	1.9
TIL_B_17	Tumor	0.1	0.2	0.5	0.2	0.1	0.1	0	0.1	0.2	0.8	1.5	0.2	31.3	0.1	38.9	2.2	2	20.1	0.1	1.3
TIL_B_21	Tumor	0	0.3	1	0.6	2.1	0.1	0.2	0	0	0.5	11.2	0.1	14.9	0.1	41.2	8.6	2.2	13	0.3	3.7
TIL_B_22	Tumor	0	0.1	0.3	0.1	0	0	0	0	0	0.1	14.7	0	7.1	0	46.8	14.1	1.3	12.4	0.9	2
TIL_B_23	Tumor	4.5	12.4	19.9	0.5	26.2	0.3	1.2	0.1	0	0.2	1.6	0	3.7	2.4	2.6	3.4	0.5	4.7	1.4	9.4
TIL_B_24	Tumor	0	1	0.7	0.4	4.6	0.1	0	0	0	0.3	11.4	0	16.3	0.3	23.1	17.5	2.3	11	2.8	8
TIL_B_25	Tumor	0.1	1.6	0.9	0.6	0.5	0	0	0	0	0.1	20.9	0	21.8	0.3	4.9	15	3.3	11.5	2.3	16
TIL_B_27	Tumor	0.1	12	4.2	0.5	1.6	0.1	0.1	0	0	0	1.9	0	19.6	0.2	23.1	21.5	0.6	9.3	0.8	4.4
TIL_B_28	Tumor	0	3.3	0.9	1.1	0.4	0.3	0	0	0	0	10.4	0.1	31.1	0.3	9.3	13.4	2.8	15	2.6	9
TIL_B_29	Tumor	0	1	0.7	0.4	4.6	0.1	0	0	0	0.3	11.4	0	16.3	0.3	23.1	17.5	2.3	11	2.8	8
	p_adj (GLMM)	9.5e-07	4.4e-15	1.9e-05	0.012	3.1e-07	0.038	8e-06	0	0.00025	0	3.2e-12	0	0.24	7.5e-13	3.4e-10	6e-11	1.7e-07	2.2e-09	0.00048	0.0045
	Blood(median)	1.1	0	0.3	0.2	0	0.1	0.3	0.8	0.3	15.3	45.3	0.8	9.9	1.2	9.2	2.2	0.9	3.7	0.2	2.2
	Tumor(median)	0.1	1	1.1	0.5	0.8	0.1	0	0	0	0.3	10.4	0	14.9	0.3	30.7	9.6	2.3	11.5	0.8	4.4

## Sheet: Figure 1D
sample_id	Tissue	Total Bregs (VISTA+ IL-10+)	C18	C20
PBMC_B_07	Blood	0.014436	0.027	0.23
PBMC_B_09	Blood	0.005472	0.063	0.11
PBMC_B_11	Blood	0.014	0.00792	0.018
PBMC_B_13	Blood	0.00756	0.11	0.16
PBMC_B_14	Blood	0.0032256	0	0.018
PBMC_B_16	Blood	0.0046644	0.0033	0.046
PBMC_B_17	Blood	0.009828	0.014	0.19
PBMC_B_21	Blood	0.0039552	0.00582	0.031
PBMC_B_22	Blood	0.004066	0.00166	0.02
PBMC_B_23	Blood	0.002322	0	0.026
PBMC_B_24	Blood	0.0018618	0.024	0.024
PBMC_B_25	Blood	0.009192	0.035	0.063
PBMC_B_27	Blood	0.007668	0.045	0.089
PBMC_B_28	Blood	0.031027	0.039	0.061
PBMC_B_29	Blood	0.011067	0.022	0.075
TIL_B_07	Tumor	0.105711	0.79	0.41
TIL_B_09	Tumor	0.09724	0.06	0.43
TIL_B_11	Tumor	2.16944	20.6	8.82
TIL_B_13	Tumor	0.1656	0.22	0.91
TIL_B_14	Tumor	1.31087	0.63	2.95
TIL_B_16	Tumor	3.729	9.89	23
TIL_B_17	Tumor	0.07076	0.13	0.36
TIL_B_21	Tumor	0.039204	0.13	0.24
TIL_B_22	Tumor	0.13482	0.012	0.24
TIL_B_23	Tumor	0.92127	4.88	23.2
TIL_B_24	Tumor	0.30879	0.12	1.05
TIL_B_25	Tumor	0.2369	0.32	1.6
TIL_B_27	Tumor	1.7136	0.94	12.9
TIL_B_28	Tumor	0.90798	0.096	2.29
TIL_B_29	Tumor	3.2724	21.3	16.5

## Sheet: Figure 2B
sample_id	Tissue	scMEP1	scMEP2	scMEP3	scMEP4	scMEP5	scMEP6	scMEP7	scMEP8	scMEP9
TIL_04	Tumor	63.5	6.7	1.2	20.3	0.1	0.5	6.4	1.2	0.2
TIL_30	Tumor	87.9	3	0.1	0.3	0	0.1	0	8.5	0
TIL_31	Tumor	91.5	4	0.2	1.3	0	0.1	0.5	2.2	0.2
TIL_32	Tumor	89.7	3.8	0.2	1.3	0.4	0.2	0.6	3.9	0
TIL_33	Tumor	84.8	3.3	0.3	4.2	0.5	0.3	3.9	2.4	0.3
TIL_35	Tumor	88.1	6	0.5	0.8	0	0.2	0.1	4.2	0
TIL_38	Tumor	93.1	4.5	0	0.6	0.9	0	0	0.9	0
TIL_39	Tumor	79.5	3.1	0.4	11.7	0.3	0.2	2.1	2.4	0.3
TIL_40	Tumor	93	3.8	0.5	1	0.2	0.1	0.1	1.3	0
TIL_41	Tumor	93	3.1	0.3	0.4	0.1	0	0.2	2.8	0
TIL_42	Tumor	64	8.9	0.7	17.2	0.2	0.7	4	3.7	0.6
TIL_43	Tumor	88.2	6.2	0.3	1.2	0.5	0.2	0.6	2.5	0.3

## Sheet: Figure 2F
Data reports values obtained by subtracting non-stimulated values from stimulated values.
		GM-CSF		IFN-γ		IL-6		IL-10		TGF-β		TNF
sample_id	Tissue	VISTA−	VISTA+	VISTA−	VISTA+	VISTA−	VISTA+	VISTA−	VISTA+	VISTA−	VISTA+	VISTA−	VISTA+
TIL-45	Tumor	0.72	13.1	0.07	2.69	0.07	1.19	1.46	8.96	38.9	92.2	44.1	78.5
TIL-46	Tumor	0.69	33.3	0	45.6	0	36.4	0	54.7	21.5	100	41	88.9
TIL-48	Tumor	0.43	22.2	0.09	0	0	0	0.38	8.33	8.28	55.6	57.6	91.7
TIL-50	Tumor	2.6	20.7	0.48	4.14	0.03	1.4	2.23	9.99	21.4	68.6	70.2	90.7
TIL-51	Tumor	0.4	34.7	0.12	44.8	0.57	41.5	4.87	48	34.5	83.8	36.2	84.5
TIL-47	Tumor	0.21	4.35	0.1	0	0	0	5.96	5.93	41.1	89.6	40.7	53.6
TIL-55	Tumor	0.18	4.25	0.097	0.78	0.14	2.98	1.13	4.86	14.1	74.9	28.4	46.2
TIL-56	Tumor	2.55	28	0.25	0.37	0.028	0.37	4.78	5.17	36.1	75.6	69.2	84.1
TIL-43	Tumor	2.03	17.6	0.29	17.6	0.29	5.88	1.45	5.88	28.1	78	47.8	58.8
TIL-52	Tumor	3.85	45.7	0.77	41.4	0.38	51.7	3.08	40	23.8	74	35	66

## Sheet: Figure 3C(left)
Phenotype	CD4+ T	CD8+ T	Dendritic	Plasma	Macrophage	Natural Killer	CD14+ Monocyte
CD4+ T	NA	NA	NA	NA	NA	NA	NA
CD8+ T	2.95e-54	NA	NA	NA	NA	NA	NA
Dendritic	3.42e-268	1.48e-43	NA	NA	NA	NA	NA
Plasma	4.59e-110	2.33e-09	3.98e-13	NA	NA	NA	NA
Macrophage	0	4.13e-177	6.84e-72	6.75e-105	NA	NA	NA
Natural Killer	3.76e-28	4.47e-05	0.0549	0.237	1.47e-14	NA	NA
CD14+ Monocyte	2.69e-264	1.69e-92	2.39e-30	4.64e-57	0.715	7.84e-13	NA
Tumor	0	0	0	0	0	6.84e-150	0

## Sheet: Figure 3C(right)
Cell type	CD4+ T	Macrophages	Plasma cells	CD8+ T	Tumoral cells	Dc	Monocytes	NK
Number of contact to B cells	350	128	106	98	92	70	22	19

## Sheet: Figure 3E
The table reports the percentage of cells expressing VSIR, SELPLG (CD162), or VSIR+IL10 genes (Cosmx spatial transcriptomic data).
	VSIR			SELPLG			VSIR + IL10
TLS*	B	CD4	CD8	B	CD4	CD8	B	CD4	CD8
#1	16.33	11.33	13.81	5.95	18.33	16.05	1.63	0.44	0.15
#2	11.52	7.13	9.91	4.73	13.25	14.43	0.85	0.61	0.25
#3	14.04	9.01	9.16	6.81	11.74	17.56	1.06	0.83	0.11
#4	12.47	12.52	11.38	4.87	15.54	15.38	1.18	1.26	0.29
#5	11.53	11.09	10.78	3.3	11.27	14.04	1	0.65	0
*Tertiary lymphoid structure

## Sheet: CD4_Phenotype_Figure 4B
sample_id	Tissue	C24	C20	C12	C30	C25	C15	C18	C9	C19	C14	C28	C27	C29	C23	C22	C21	C17	C26	C7	C4	C5	C13	C11	C6	C16	C8	C1	C10	C2	C3
PBMC_T_07	Blood	0	0	0	0	0	0	0	0.1	0	0	0	0	0	0	0	0.1	1.4	0.1	0.1	1.2	3.3	0.3	0	7.3	2.9	0.6	3.8	0.4	19.8	58.6
PBMC_T_09	Blood	0	0	0	0	0	0	0	0	0	0	0	0	0	0.1	0.1	0.6	8.9	0.3	0.7	1.6	2.8	0.4	0.1	7.9	6.2	0.5	2.5	0.3	35.1	32
PBMC_T_11	Blood	0	0	0	0	0	0	0	0	0	0	0	0	0	0	0	2.1	4.7	0.1	0.2	1.1	3.4	0.4	0	5.1	4.8	0.5	0.4	0.4	28.3	48.4
PBMC_T_13	Blood	0	0	0	0	0	0	0	0	0	0	0	0	0	0	0	0.5	6.9	0.8	0.7	2.3	3.4	0.2	0	3.9	10.2	1.3	2.8	0.4	30.9	35.5
PBMC_T_14	Blood	0	0	0	0	0	0	0	0	0	0.1	0	0	0	0	0	0.1	0.1	0.1	0.1	1.4	5.9	0.4	0.1	5.9	2.6	0.4	10	3.8	35.9	32.9
PBMC_T_16	Blood	0	0	0	0	0	0	0	0	0	0	0	0	0	0	0	0	0	0	0	0.1	0.4	0.4	0	3	1.5	0.2	6.1	1.1	59.3	28
PBMC_T_17	Blood	0	0	0	0	0	0	0	0	0	0	0	0	0	0	0	0.5	1.1	0	0	0.1	1.3	0.1	0	7.5	3.2	0.8	14.1	1.4	51.1	18.6
PBMC_T_21	Blood	0	0	0	0	0	0	0	0	0	0	0	0	0	0	0	0.1	0.6	0.1	0.3	2.1	2.5	0.2	0	4.3	9.2	0.3	1.9	0.5	36	41.8
PBMC_T_22	Blood	0	0	0	0	0	0	0	0	0	0.1	0	0	0	0	0	2.1	1.5	0	0	0.3	1.6	0.5	0	2.1	2.1	0.6	10.8	2.6	28.6	46.9
PBMC_T_23	Blood	0	0	0	0	0	0	0	0	0	0.1	0	0	0	0	0	2	20.8	0	0	0.1	0.3	0.1	0.1	1.7	1	0.6	2.3	4.6	14.4	51.9
PBMC_T_24	Blood	0	0	0	0	0	0	0	0	0	0	0	0	0	0	0	0	0	0	0	0	0.2	0.1	0	4.3	1.5	0	11.3	0.4	44.6	37.5
PBMC_T_25	Blood	0	0	0	0	0	0	0	0	0	0	0	0	0	0	0	0.6	1.1	0	0.1	1.6	3.7	0.2	0	4.6	2.9	0.2	2.2	1	22.6	59.1
PBMC_T_27	Blood	0	0	0	0	0	0	0	0	0	0	0	0	0	0	0	2	34.4	0	0	0.2	0.6	0.7	0	1.8	11.2	0.2	5.8	0.2	30	12.9
PBMC_T_28	Blood	0	0	0	0	0	0	0	0	0	0.1	0	0	0	0	0	0.3	3.8	0.1	0.1	0.9	3.9	0.1	0.1	4.9	1.2	0.6	5.4	2	18.6	58.1
PBMC_T_29	Blood	0	0	0	0	0	0	0	0	0	0.1	0	0	0	0	0.1	0.6	6.3	0.1	0.2	1.4	5.1	0.1	0	4.6	5.6	0.4	2.7	0.6	47.6	24.3
TIL_T_07	Tumor	0.2	1.5	0.4	7.1	0.5	0.4	0.3	21.3	1.5	6.3	0.1	0.4	1.9	0.4	3.3	0	6.2	0.2	0.1	1.5	1.4	0.4	3.2	2.4	0.5	0.1	0.4	26.4	8.3	3.1
TIL_T_09	Tumor	2.7	6.9	3.6	2	1.2	6.4	1.6	5	2.1	5.8	3.6	6.4	2.9	3.2	3.2	0.1	2	1.9	2.4	2.3	2.7	0.7	5.3	3.4	4.3	0.3	0.9	9.1	6.7	1.2
TIL_T_11	Tumor	0	0.4	0.2	5.4	1.3	0.1	0.1	3.5	0.3	5.7	0	0	0.2	0.2	1.2	0.3	16.4	0.2	0.2	1.2	2.5	1.4	0.9	1.2	0.3	0.4	0.2	35.6	11.9	8.7
TIL_T_13	Tumor	0.4	0.1	0.1	7.4	5.8	0.2	1.3	8.9	8.7	25.3	3.5	2.8	8.7	0.7	2.7	0	0.2	0.2	0.2	0.5	0.3	0.1	0.1	0.1	0	0.2	0.4	16.1	4.8	0.2
TIL_T_14	Tumor	0.7	1.6	0.8	0.6	1	2.4	0.3	15.3	1.4	12.8	0.8	2.4	2.4	1.3	3.3	0	0.1	0.5	0.6	2	1.7	0.1	5.8	0.9	1.5	0.3	1.6	29.7	7.2	1
TIL_T_16	Tumor	1.7	1.7	8.6	12.6	7.8	2.1	1.9	12.2	7.7	13.9	1	0.3	1.5	1	1.1	0	0.1	0.2	0	0.2	0.3	0	0.7	0.1	0.1	0.1	0.6	19.9	2.6	0.3
TIL_T_17	Tumor	4.8	3.5	2.9	1	1.1	4.5	9	13.2	1.9	6.6	0.7	0.4	0.5	4.1	2.1	0.1	0.2	0.7	0.1	0.2	1	0.1	4.8	1.8	1.7	0.6	1.4	22.7	7.4	0.7
TIL_T_21	Tumor	0.1	0.2	0.7	0.9	4.2	0.2	0.3	8.8	2.8	24.2	0.6	2.4	7.6	1.3	4.5	0	0	0.1	0.1	0.7	0.5	0.1	0.6	0.1	0.1	0.1	0.5	31.4	6.4	0.4
TIL_T_22	Tumor	0	0	1.3	1.3	2.7	0	0.1	14.2	14.9	14.1	0	0.2	6.6	0.1	2.6	0	3	0.1	0	0.1	0.2	0.1	0	0	0	0.1	1.4	31.8	2.3	2.6
TIL_T_23	Tumor	0.9	0.1	1.1	9.9	8.5	0.1	2.8	22.5	8.4	16.1	0.8	0.3	1.6	1.4	1.6	0	1.3	0.2	0	0.1	0	0.1	0.2	0	0	0.1	0.3	19.5	1.9	0.3
TIL_T_24	Tumor	0.2	0.1	0.1	2.9	1.7	0.1	2	13.5	11.5	27	0.2	0.1	1.6	0.2	1.1	0	0	0.1	0	0.1	0.2	0.2	0.3	0.1	0	0.1	0.8	30.4	5.2	0.4
TIL_T_25	Tumor	0.1	0	0	0.5	0.6	0	0.6	13.5	2	10.9	8.4	1.1	18.2	9.2	8.7	0	0.3	0.5	0.2	0.9	1.2	0	0	0	0	0.2	0.3	18	3.7	0.8
TIL_T_27	Tumor	0.1	0	1	2.9	14.7	0	0.2	13.3	4.8	23.9	0.1	0	1.7	0.2	2.7	0	2.7	0	0	0.1	0.2	0.1	0	0	0	0.1	1	25.5	4.5	0.2
TIL_T_28	Tumor	0.1	0.1	0	1.4	0.8	0.1	1.6	15.5	4.6	13.5	1.4	1.1	8.7	8	8.3	0	1	0.3	0.1	0.4	1	0.1	0.1	0	0	0.2	0.3	26.4	3.7	1.1
TIL_T_29	Tumor	0.3	0.7	0.2	15.9	6.2	0	0	37	6.9	10.5	0.3	0.2	2	0.1	1.2	0	3.6	0	0	0.1	0.1	0.1	0.4	0.1	0	0	0.1	11.5	2.4	0.1
	p_adj (GLMM*)	0	9.1e-15	0	0	0	1.2e-09	0	0	0	0	0	0	0	0	0	3.3e-06	0.012	0.0054	0.86	0.12	3.3e-06	0.018	9.6e-09	7.4e-16	8.1e-11	5.1e-05	0	0	0	0
	Blood(median)	0	0	0	0	0	0	0	0	0	0	0	0	0	0	0	0.5	1.5	0.1	0.1	1.1	2.8	0.2	0	4.6	2.9	0.5	3.8	0.6	30.9	37.5
	Tumor(median)	0.2	0.2	0.7	2.9	1.7	0.1	0.6	13.5	4.6	13.5	0.7	0.4	2	1	2.7	0	1	0.2	0.1	0.4	0.5	0.1	0.4	0.1	0	0.1	0.5	25.5	4.8	0.7
	*Generalized Linear Mixed Model

## Sheet: Figure 4C
		PSGL1+ (MFI x1000)
sample_id	Tissue	GZMB	CD226	CD39	CTLA-4	CD96	CD69	PD-1	CD161	CD45RA	CXCR6	CCR7	T-BET	Ki67	CD49a	CD103
TIL_T_07	Tumor	4.661	7.734	2.062	1.915	2.327	6.51	4.885	2.682	0.95	1.37	0.478	1.156	1.93	13.7	0.778
TIL_T_09	Tumor	0.936	4.34	2.399	3.3	2.879	16.059	8.537	4.28	0.99	1.184	0.675	1.013	2.52	2.59	0.328
TIL_T_11	Tumor	7.874	14.689	2.57	0.29	2.195	1.426	3.787	1.652	1.27	1.354	0.425	3.034	1.53	0.65	0.536
TIL_T_13	Tumor	0.995	6.229	2.062	3.226	1.732	17.096	12.41	2.522	0.85	1.411	0.669	0.762	1.72	4.61	0.717
TIL_T_14	Tumor	0.636	6.021	2.191	2.36	1.735	13.86	4.601	2.906	0.89	0.947	1.543	0.518	1.32	1.99	0.408
TIL_T_16	Tumor	0.764	6.229	2.112	5.958	2.613	34.287	6.388	2.265	1.09	1.357	0.597	1.494	1.08	7.23	0.695
TIL_T_17	Tumor	0.567	3.741	2.058	3.698	2.315	18.112	4.872	2.81	0.89	1.637	1.067	0.797	1.8	2.66	0.727
TIL_T_21	Tumor	0.578	7.877	2.013	1.534	2.319	13.169	5.418	1.907	0.9	0.783	0.677	0.8	1.2	1.85	0.337
TIL_T_22	Tumor	3.143	4.545	1.957	1.189	1.646	14.857	1.686	2.069	1.22	1.289	0.367	1.477	1.05	2.64	0.838
TIL_T_23	Tumor	0.96	5.162	2.21	4.504	1.521	34.762	7.34	2.694	1.08	1.761	0.802	1.218	2.26	3.57	0.939
TIL_T_24	Tumor	0.546	5.599	1.788	3.232	1.308	24.533	6.909	2.993	0.84	0.807	1.024	0.458	0.99	2.16	0.843
TIL_T_25	Tumor	2.321	3.082	3.45	5.164	1.03	25.963	10.742	3.449	1.45	2.339	0.537	1.972	5.26	3.97	1.361
TIL_T_27	Tumor	1.827	9.61	2.005	3.081	2.077	16.311	9.92	0.593	1.23	1.042	0.395	1.817	1.35	5.02	0.518
TIL_T_28	Tumor	2.045	5.494	2.348	3.075	1.277	19.5	4.752	2.304	0.91	1.364	0.726	1.333	2.55	5.94	0.809
TIL_T_29	Tumor	4.205	9.024	3.168	3.53	1.634	18.064	7.244	2.355	1.25	1.175	0.48	2.599	1.19	2.88	0.589
		PSGL1− (MFI x1000)
sample_id	Tissue	GZMB	CD226	CD39	CTLA-4	CD96	CD69	PD-1	CD161	CD45RA	CXCR6	CCR7	T-BET	Ki67	CD49a	CD103
TIL_T_07	Tumor	2.66	4.693	1.987	2.476	1.695	18.352	3.331	3.471	0.8	1.172	0.818	0.604	1.65	14.19	0.702
TIL_T_09	Tumor	0.94	2.884	2.035	2.612	1.241	17.141	8.325	3.037	0.91	0.748	0.552	0.729	1.48	1.27	0.279
TIL_T_11	Tumor	1.2	6.564	2.182	0.579	1.205	6.51	1.491	1.947	0.98	0.906	1.659	0.952	0.96	0.66	0.477
TIL_T_13	Tumor	0.9	3.949	2.163	4.295	0.886	28.704	12.102	2.852	0.8	1.392	0.726	0.718	1.16	3.9	0.651
TIL_T_14	Tumor	0.69	4.097	2.04	1.745	0.935	10.87	4.141	2.319	0.92	0.801	1.419	0.534	1.39	1.73	0.393
TIL_T_16	Tumor	0.76	4.731	1.953	4.828	1.698	30.146	6.003	2.34	1.01	1.211	0.463	1.355	0.88	4.78	0.585
TIL_T_17	Tumor	0.59	2.857	1.788	2.296	1.345	14.184	3.396	2.206	0.83	1.068	1.175	0.647	1.14	1.83	0.536
TIL_T_21	Tumor	0.54	5.693	1.97	1.812	1.423	17.096	6.095	2.069	0.85	0.639	0.784	0.68	0.88	1.44	0.317
TIL_T_22	Tumor	0.68	3.536	1.966	2.955	0.797	29.819	4.588	2.088	0.99	0.657	0.845	0.797	1.04	2.31	0.661
TIL_T_23	Tumor	0.63	4.304	2.013	4.364	1.228	41.948	7.282	3.069	1.07	1.169	1.254	0.866	1.24	2.88	0.875
TIL_T_24	Tumor	0.58	3.41	1.662	3.081	0.681	23.25	6.488	2.406	0.85	0.606	0.975	0.478	0.9	1.15	0.661
TIL_T_25	Tumor	1.77	2.788	2.363	4.087	0.708	26.46	6.642	2.757	0.82	1.034	1.033	1.068	1.73	4.07	0.846
TIL_T_27	Tumor	0.68	5.543	1.73	3.826	1.136	23.063	6.556	1.188	0.92	0.722	0.756	0.952	0.79	4.11	0.371
TIL_T_28	Tumor	1.47	3.034	2.399	3.266	0.708	23.312	4.752	2.032	0.8	1.062	0.996	0.816	1.59	5.75	0.678
TIL_T_29	Tumor	0.99	5.179	3.243	9.369	1.439	63.484	7.537	6.124	0.85	0.95	0.724	0.881	0.94	2.27	0.651

## Sheet: Figure 4E
sample_id	Tissue	scMEP1	scMEP2	scMEP3	scMEP4	scMEP5	scMEP6	scMEP7	scMEP8	scMEP9	scMEP10	scMEP11	scMEP12	scMEP13	scMEP14	scMEP15
TIL_04	Tumor	0.2	7.1	38.6	0	0.6	0.5	7.3	0.3	1	31.7	1	0.9	0.4	0.8	9.5
TIL_30	Tumor	1.2	14.3	16.9	3.6	1.7	2.5	18.4	3.4	1.2	29.7	1.6	1.6	1.3	0.3	2.1
TIL_31	Tumor	0.1	7.8	27	0	0.1	0.3	6.7	0.2	0.1	45	0.8	0.4	1.4	0.3	9.7
TIL_32	Tumor	0.1	9.3	40.5	0	0.2	1	5.5	0.2	0.2	29.2	0.9	0.3	0.7	0.6	11.3
TIL_33	Tumor	0.3	5.4	31.8	0.2	0.6	1.5	12.3	0.2	0.3	36.7	1.8	0.2	0.5	0.2	7.9
TIL_35	Tumor	0	4.2	38.8	0	0	0.5	7.6	0	0	33.7	0.6	0.1	0.4	0.8	13.1
TIL_38	Tumor	0	3.1	36.8	0	0.2	0.3	8.5	0.1	0	40.1	1	0.1	0.7	1	8.1
TIL_39	Tumor	0.3	7.2	26.8	0.3	0.6	2	12	0.6	0.4	38.9	1.2	0.3	0.6	0.6	8.1
TIL_40	Tumor	0.1	2.7	41.3	0	0.4	0.6	12.2	0.3	0.3	28.4	2.1	0.8	0.2	1.2	9.4
TIL_41	Tumor	0.1	6.8	22.7	0	0.2	0.2	3.5	0	0	47.3	0.5	0.2	1.7	0.3	16.4
TIL_42	Tumor	0.4	11.4	27	0.1	0.4	3.6	13.7	0.4	0.1	29.3	1.4	0.3	0.3	0.5	11.1
TIL_43	Tumor	0	11.8	31.8	0	0.5	0.5	8.1	0.2	0.4	34	1.1	0.4	0.9	0.4	9.8

[truncated: 21 more sheets: CD8_Phenotype_Figure 5B, Figure 5C, Figure 5E, Figure 6B and 6D, Figure 6G and 6I, Figire 7B (right), Figire 7D (right), Figire 7F (right), Supplementary Figure 1, Supplementary Figure 4, Supplementary Figure 12, Supplementary Figure 13, Supplementary Figure 15, Supplementary Figure 16, Supplementary Figure 18B, Supplementary Figure 18C, Supplementary Figure 18E(Tconv), Supplementary Figure 18E(Trm), Supplementary Figure 18E(Treg), Supplementary Figure 19C(Tconv) …]
