# Supplementary material for: Metabolically activated and highly polyfunctional intratumoral VISTA+ regulatory B cells are associated with tumor recurrence in early-stage NSCLC
Source: Springer Nature journal article supplement (doi:10.1186/s12943-024-02209-2), 2025-01-14
Supplement: MOESM2 [file 12943_2024_2209_MOESM2_ESM.xlsx]

## Sheet: NSCLC Clinical Table
Supplementary Table 1: Clinical characteristics. (U.H.; University Hospital, na; not available, FCM; Flow cytometry, ICS; Intracellular Cell Staining, COPD; Chronic obstructive pulmonary disease, CAPOX; Oxaliplatin and capecitabine). Helper; assay to detect helper cytokines.
Sample_ID	fcs_file name	U.H.	Age (y)	Sex	FCM	CyTOF	ICS	Helper	Smoker	Pack/years	Other previous cancers	List of previous cancers	Synchronous tumors	Comorbidities	Surgery date	Type of Surgery	Histological classification	Histological subhistotypes (patterns)	TNM 8th edition	T -Tumor	N - Nodes	M - Metastasis	Grading (G)	Vascular infiltrate	Pleura infiltrate	Neoadjuvant radiotherapy	Neoadjuvant chemotherapy	Adjuvant radiotherapy	Adjuvant chemotherapy	Type of adjuvant chemotherapy	Chest CT tumor size	PET FDG total body (hyper metabolism/SUV max)	Survival follow-up	Date of last follow up	Recurrence	Organs of recurrence	Date of occurrence of recurrence
PZ#4	MOD_TIL_04_01_0	MODENA	82	F		✔			NO	/	YES	Left leg melanoma in situ	NO	High blood pressure, dyslipidemia, diabetes mellitus type II under treatment, bilateral hearing loss, left hip arthroplasty, perforated appendicitis	2021-09-23	LIS	adenocarcinoma	Papillary (acinar and micropapillary)	IA3	T1c	N0	M0	G2	NO	NO	NO	NO	NO	NO	/	30 x 35 mm	4.9	Live	2023-03-01	NO	/	/
PZ#7	TIL_07	FORLI	76	M	✔				Former	35.0	NO	/	NO	Diabetes mellitus	2021-10-27	LID	adenocarcinoma	Acinar	IA2	T1b	N0	M0	G1	NO	NO	NO	NO	NO	NO	/	18 x 10 mm	1.2	Dead	2023-03-08	YES	Lung and bones	2023-03-08
PZ#9	TIL_09	FORLI	73	M	✔				YES	20.0	NO	/	NO	Trigeminal neuralgia, previous pneumonia, high blood pressure, BPH	2021-11-10	LSS	squamous cell carcinoma	Keratinizing	IIB	T3	N0	M0	G2	NO	YES	NO	NO	NO	NO	/	97 x 44 mm	25	Live	2023-06-08	YES	Brain	2022-07-01
PZ#11	TIL_11	MODENA	72	M	✔				YES	56.0	NO	/	NO	Arterial hypertension, emphysematous COPD on inhalation therapy, BPH	2021-12-02	LID	adenocarcinoma	Acinar (micropapillary 25%)	IIIA	T1c	N2	M0	G3	YES	NO	NO	NO	YES	YES	Chemo-immunotherapy with carboplatin/pemetrexed/pembrolizumab	25 x 30 mm	13.6	Live	2023-06-20	YES	Right adrenal, resolved after adjuvant therapy, left adrenal, acetabulum and right gluteus	2022-01-19
PZ#13	TIL_13	MODENA	75	M	✔				Former	na	NO	/	NO	High blood pressure, dyslipidemia, previous HBV infection, ventricular extra-systoles	2021-12-14	LM	adenocarcinoma	Solid (acinar 10%)	IA2	T1b	N0	M0	G3	NO	NO	NO	NO	NO	NO	/	15 x 29 mm	10.8	Live	2023-06-15	NO	/	/
PZ#14	TIL_14	FORLI	63	M	✔				YES	30.0	NO	/	NO	Lower limb varicose veins	2021-12-14	LSD	pleomorphic infiltrating carcinoma	Pleomorphic	IIB	T2b	N0	M0	G3	NO	YES	NO	NO	NO	NO	/	54 X 46 mm	31	Live	2023-06-16	YES	Lung	2022-04-29
PZ#16	TIL_16	FORLI	68	F	✔				YES	40.0	NO	/	NO	Arthrosis, gastro-oesophageal reflux esophagitis	2022-01-12	LSS	adenocarcinoma	Acinar	IA2	T1b	N0	M0	G2	NO	NO	NO	NO	NO	NO	/	24 x 14 x 17mm	4.19	Live	2023-03-06	NO	/	/
PZ#17	TIL_17	FORLI	78	M	✔				NO	/	NO	/	NO	Hypertension, hypercholesterolemia	2022-01-19	LM	adenocarcinoma	Acinar, solid and papillary	IIA	T2b	N0	M0	G2	NO	NO	NO	NO	NO	NO	/	42 x 30 x 30 mm	4.72	Live	2023-06-30	NO	/	/
PZ#21	TIL_21	MODENA	70	F	✔				YES	25.0	YES	Warthin's tumor right parotid gland, well-differentiated endometrioid adenocarcinoma	NO	Obesity, COPD with asthma component, diabetes mellitus type II, hypertension, right carotid plaque with 50% stenosis, chronic sinusitis, multinodular goiter, anxiety-depressive syndrome, headache with aura	2022-03-08	LSD	adenocarcinoma	Acinar	IA2	T1b	N0	M0	G2	NO	NO	NO	NO	NO	NO	/	23 x 27 mm	11.9	Live	2023-03-28	NO	/	/
PZ#22	TIL_22	FORLI	69	F	✔				NO	/	YES	Meningioma, cavernoma	NO	Hypothyroidism, hypercholesterolemia	2022-03-16	LM	adenocarcinoma	Acinar	IA3	T1c	N0	M0	G1	NO	NO	NO	NO	NO	NO	/	24 x 17 x 13 mm	2.03	Live	2023-05-03	NO	/	/
PZ#23	TIL_23	MODENA	71	F	✔				NO	/	NO	/	NO	Hypertension	2022-03-22	LSD	adenocarcinoma	Solid	IIB	T2a	N1	M0	G3	YES	NO	NO	NO	NO	NO	/	35 x 38 mm	17.1	Live	2023-03-28	NO	/	/
PZ#24	TIL_24	FORLI	73	F	✔				YES	15.0	NO	/	NO	Gastritis, psoriasis, sinus tachycardia on medical beta blocker therapy	2022-03-29	LSS	adenocarcinoma	Acinar	IIB	T2a	N0	M0	G2	NO	NO	NO	NO	NO	NO	/	35 mm	18.4	Live	2022-11-23	NO	/	/
PZ#25	TIL_25	FORLI	70	M	✔				YES	15.0	NO	/	NO	Dyslipidemia, diabetes mellitus	2022-04-12	LSD	non-small cell lung cancer	Solid	IIB	T3	N0	M0	G3	NO	NO	NO	NO	NO	NO	/	33 x 23 mm	9.3	Live	2023-06-14	NO	/	/
PZ#27	TIL_27	MODENA	76	F	✔				Former	10.0	YES	Ductal carcinoma in situ of G3 left breast, nodular lesion of II finger of right hand resulting in giant cell tumor of tendon sheaths,cutaneous basaliomas	NO	Fibocystic mastopathy, osteopenia, tonsillectomy, cataract OS	2022-05-18	LSS	adenocarcinoma	Papillary	IIB	T2	N1	M0	G2	YES	YES (PL1)	NO	NO	NO	YES	Immunotherapy	18 x 21 mm	3.4	Live	2023-07-11	YES	Upper right lung lobe	2022-06-21
PZ#28	TIL_28	FORLI	77	M	✔				NO	/	YES	Rectal adenocarcinoma, noninvasive papillary K urothelial + nonpapillary K urothelial cells in situ	NO	COPD, multinodular goiter, hypertension, arteriopathy AAII	2022-05-25	LSD	adenocarcinoma	Solid and acinar	IA3	T1c	N0	M0	G3	NO	NO	NO	NO	NO	NO	/	26 mm	6.7	Live	2023-07-03	NO	/	/
PZ#29	TIL_29	FORLI	67	M	✔				YES	15.0	YES	Chronic myelomonocytic leukemia, diagnosed in November 2020	NO	AOCP II stage B of Fontaine left lower limb, diabetes mellitus type II, psoriasis.	2022-06-15	LM	adenocarcinoma	Acinar	IIB	T2a	N0	M0	G2	NO	YES (PL1)	NO	NO	NO	NO	/	15 x 12 mm	1.86	Dead	2022-12-01	NO	/	/
PZ#30	MOD_TIL_30_01_1	FORLI	70	M		✔			YES	15.0	YES	Low-grade papillary urothelial cell carcinoma, prostatectomy for neoplasm in 2017	NO	COPD, pulmonary emphysema	2022-07-27	LSD	adenocarcinoma	Acinar	IA3	T1c	N0	M0	G3	NO	NO	NO	NO	NO	NO	/	26 mm	9.35	Live	2023-03-06	NO	/	/
PZ#31	MOD_TIL_31_01_1	FORLI	76	F		✔			YES	15.0	NO	/	NO	Carotid atheroma, sinus tachycardia, hypercholesterolaemia, hysterectomy for uterine leiomyoma	2022-10-26	LSS	adenocarcinoma	Acinar	IA2	T1b	N0	M0	G1	NO	NO	NO	NO	NO	NO	/	15 mm	1.36	Live	2023-06-26	NO	/	/
PZ#32	MOD_TIL_32_01_1	FORLI	72	M		✔			YES	10.0	YES	Right colon neoplasia	NO	Chronic gastritis, polyposis of the gallbladder	2022-11-08	LSS	adenocarcinoma	Enteric type	IB	pT2a	N1	M0	G2	NO	YES	NO	NO	NO	YES	Immunotherapy	20 x 22 x 15 mm	7.22	Live	2023-01-17	YES	Lung	2023-01-13
PZ#33	MOD_TIL_33_01_1	FORLI	69	M		✔			YES	30.0	NO	/	NO	Left adrenal adenoma, previous aortic dissection, previous intestinal perforation	2022-11-25	LID	squamous cell carcinoma	Non-keratinizing	IB	pT2a	N1	M0	G3	NO	YES	NO	NO	NO	YES	Cisplatin/vinolrebine	30 x 20 x 20 mm	4.3	Live	2023-06-23	NO	/	/
PZ#35	MOD_TIL_35_01_1	FORLI	65	M		✔			YES	20.0	NO	/	NO	Hypertension, right carotid TEA, type II diabetes mellitus, kidney stones.	2022-12-07	LID	adenocarcinoma	Acinar and solid	IB	T2a	N0	M0	G3	NO	YES	NO	NO	NO	NO	/	20 mm	1.35	Live	2023-03-22	YES	Lung	2023-02-03
PZ#38	MOD_TIL_38_01_1	FORLI	64	F		✔			NO	/	NO	/	NO	Appendectomy	2023-01-20	LSD	adenocarcinoma	Acinar	IA1	T1a	N0	M0	G1	NO	NO	NO	NO	NO	NO	/	17 mm	1.9	Live	2023-02-24	NO	/	/
PZ#39	MOD_TIL_39_01_1	FORLI	62	F		✔			YES	40.0	NO	/	NO	Colon diverticulosis	2023-01-25	LID	adenocarcinoma	Solid and acinar	IB	T2a	N0	M0	G3	NO	YES	NO	NO	NO	NO	/	30 mm	9.49	Live	2023-03-08	NO	/	/
PZ#40	MOD_TIL_40_01_1	FORLI	75	F		✔			YES	80.0	NO	/	NO	COPD, hypothyroidism, hypertensive and hyperkinetic heart disease	2023-02-08	LSD	adenocarcinoma	Acinar	IB	T2a(m)	N0	M0	G1	NO	YES	NO	NO	NO	NO	/	23 mm	2.7	Live	2023-03-20	NO	/	/
PZ#41	MOD_TIL_41_01_1	FORLI	79	M		✔			YES	15.0	NO	/	NO	COPD, hypothyroidism, hypertensive and hyperkinetic heart disease	2023-02-10	LSD	adenocarcinoma	Acinar (90%) and lepidic (10%)	IA3	T1c	N0	M0		NO	NO	NO	NO	NO	NO	/	25 x 20 mm	8.5	Live	2023-05-12	NO	/	/
PZ#42	MOD_TIL_42_01_1	FORLI	78	M		✔			YES	63.0	NO	/	NO	Bilateral inguinal hernia, left leg fracture due to road accident.	2023-02-21	LSS	squamous cell carcinoma	Non-keratinizing	IIA	T2b	N0	M0	G3	NO	NO	NO	NO	NO	NO	/	42 x 35 x 20 mm	circumscribed metabolic hyperfixation	Live	2023-06-22	NO	/	/
PZ#43	MOD_TIL_43_01_1	FORLI	50	F		✔	✔		YES	27.0	NO	/	NO	Umbilical hernia, uterine fibroid	2023-02-24	LSS	adenocarcinoma	Acinar	IIB	T1b	N1	M0	G2	NO	NO	NO	NO	NO	YES	Immunotherapy	18 x 17 x 13 mm	5	Live	2023-03-31	NO	/	/
PZ#45	TIL-45	FORLI	69	F			✔		YES	37.5	NO	/	NO	Uterine fibroids, previous bronchitis, hypercholesterolemia	2023-03-07	LID	squamous cell carcinoma	Keratinizing	IA3	T1c	N0	M0		NO	NO	NO	NO	NO	NO	/	27 mm	7	Live	2023-04-24	NO	/	/
PZ#46	TIL-46	FORLI	71	F			✔		YES	10.0	YES	Uterine neoplasia	NO	Cholecystectomy, pulmonary embolism, previous Covid-19	2023-03-17	LIS	adenocarcinoma	Acinar and papillary	IA3	T1c	N0	M0	G2	NO	NO	NO	NO	NO	NO	/	27 mm	2.01	Live	2023-04-28	NO	/	/
PZ#47	TIL-47	FORLI	73	F			✔		NO	/	NO	/	NO	Uterine fibromatosis	2023-03-28	Lower right bilobectomy	adenocarcinoma	Acinar, micropapillary, papillary and solid with cribiform patterns	IIA	T2b	N0	M0	G3	NO	NO	NO	NO	NO	NO	/	43 x 28 x 30 mm	15.6	Live	2023-05-08	NO	/	/
PZ#48	TIL-48	FORLI	91	F			✔		YES	180.0	NO	/	NO	COPD, gastric ulcer with pancreatitis, gallstones, chronic renal failure, type II diabetes mellitus, hypothyroidism, previous cardiac arrest, arterial hypertension	2023-03-29	LSS	squamous cell carcinoma	Keratinizing	IIA	T2b	N0	M0		NO	NO	NO	NO	NO	NO	/	45 x 30 mm	13.95	Live	2023-06-19	NO	/	/
PZ#50	TIL-50	FORLI	62	F			✔		YES	20.0	YES	Rectal adenocarcinoma	NO	Covid-19 hospitalization; Emphysematous COPD, meningioma, cholecystectomy	2023-04-12	LIS	combined large cell neuroendocrine carcinoma and adenocarcinoma	Acinar	IA2	T1b	N1	M0		NO	NO	NO	NO	NO	YES	CAPOX	30 x 22 x 17 mm	6.39	Live	2023-05-24	NO	/	/
PZ#51	TIL-51	FORLI	70	M			✔		NO	/	YES	Nose basal cell carcinoma	NO	Disc herniation, kidney stones treated with lithotripsy, chronic renal failure	2023-04-21	LID	invasive pulmonary mucinous adenocarcinoma	Colloid adenocarcinoma with micropapillary patterns	IIIA	T3	N2	M0		NO	NO	NO	NO	NO	NO (for IRC)	/	55 mm	3.4	Live	2023-05-29	NO	/	/
PZ#52	TIL-52	FORLI	81	F			✔		YES	50.0	NO	/	NO	Osteoporosis, peripheral arterial obstructive disease.	2023-05-09	LSS	adenocarcinoma	Solid	IIB	T3	N0	M0	G3	NO	YES	NO	NO	NO	NO	/	52 mm	9.45	Live	2023-06-28	NO	/	/
PZ#53	TIL-53	FORLI	69	M			✔		YES	40.0	NO	/	NO	Atrial fibrillation, vascular disease with left femoral stent placement.	2023-06-07	LSD	squamous cell carcinoma	Keratinizing	IIIA	T4	N0	M0		NO	YES	NO	NO	NO	NO	/	85 x 55 mm	8.27	Live	2023-06-30	NO	/	/
PZ#55	TIL-55	FORLI	60	M			✔		YES	52.5	NO	/	NO	/	2023-06-14	LIS	squamous cell carcinoma	Keratinizing	IIIA	T4	N0	M0		NO	NO	NO	NO	NO	NO	/	75 x 55 x 30 mm	13.18	Live	2023-06-15	NO	/	/
PZ#56	TIL-56	FORLI	77	F			✔		YES	50.0	NO	/	NO	Syncope, idiopathic pulmonary fibrosis, paucisymptomatic COVID infection, episodes of recurrent pneumonia, chronic gastritis, cholecystectomy, appendectomy	2023-06-23	LID	squamous cell carcinoma	Keratinizing	IIA	T2b	N0	M0		NO	NO	NO	NO	NO	NO	/	50 x 40 x 25 mm	18.7	Live	Still recovered	NO	/	/
PZ#64	TIL-64	FORLI	73	M				✔	YES	50.0	NO	/	NO	/	2023-10-20	LID	squamous cell carcinoma	Keratinizing	IB	T2a	N0	M0	G2	NO	NO	NO	NO	/	/	/	40 x 37 x 22mm	10.4	Live	2024-06-05	NO	/	/
PZ#65	TIL-65	FORLI	74	M				✔	YES	25.0	NO	/	NO	/	2023-10-31	Left pneumonectomy	squamous cell carcinoma	Non-keratinizing	IIIA	T4	N0	M0	G2	NO	NO	NO	NO	/	/	/	105 x 60 x 45 mm	22.6	Live	2024-05-28	YES	Lung and lymphnode	2024-05-28
PZ#67	TIL-67	FORLI	63	F				✔	NO	/	NO	/	NO	/	2023-11-21	LSD	invasive adenocarcinoma	acinar (85%) and papillary (15%)	IIB	T2b	N0	M0	G2	NO	NO	NO	NO	/	YES	Immunotherapy (Osimertinib)	50x 40 x 30 mm	9.05	Live	2024-01-03	NO	/	/
PZ#68	TIL-68	FORLI	76	F				✔	YES	15.0	NO	/	NO	/	2023-11-28	LSS	invasive adenocarcinoma	acinar (25%), papillary (25%) and lepidic (25%)	IA2	T1b	N0	M0	G2	NO	NO	NO	NO	/	/	/	20 mm	7.23	Live	2024-01-15	NO	/	/
PZ#71	TIL-71	FORLI	65	M				✔	YES	20.0	YES	/	NO	/	2024-01-09	LID	invasive adenocarcinoma	acinar and papillary	IA3	T1c	N0	M0	G2	NO	NO	NO	NO	/	/	/	22 x 21 x 15 mm	4.4	Live	2024-02-19	NO	/	/
PZ#72	TIL-72	FORLI	75	M				✔	YES	15.0	YES	/	YES	/	2024-01-19	LM	adenocarcinoma	lepidic	IIB	T3	N0	M0	G2	NO	NO	NO	NO	/	/	/	55 x 35 x 30 mm	no detection	Live	2024-05-06	NO	/	/
PZ#74	MAIT-11	FORLI	69	M				✔	YES	6.0	NO	/	NO	/	2024-01-31	LIS	invasive adenocarcinoma	micropapillary (15%), papillary (80%) and lepidic (25%)	IIB	T2b	N0	M0	G2	NO	NO	NO	NO				43 x 28 x 30 mm	1.4	Live	2024-03-18	NO	/	/
PZ#76	TIL-76	FORLI	75	F				✔	YES	5.0	NO	/	NO	/	2024-03-05	LIS	invasive adenocarcinoma	papillary (75%), acinar (20%), and solid (5%)	IA3	T1c	N0	M0	G2	NO	NO	NO	NO	/	/	/	30 x 20 x 20 mm	8	Live	2024-04-05	NO	/	/
PZ#77	TIL-77	FORLI	56	M				✔	YES	20.0	NO	/	NO	/	2024-02-27	LSS	invasive adenocarcinoma	acinar (60%), solid (30%) and papillary (10%)	IIIA	T2a	N2	M0	G3	NO	NO	NO	NO	/	/	/	35 x 15 mm	14.8	Live	2024-04-17	NO	/	/
PZ#78	MAIT-12	FORLI	70	M				✔	YES	15.0	NO	/	NO	/	2024-03-06	LM	squamous cell carcinoma	Keratinizing	IA3	T1c	N0	M0		NO	NO	NO	NO				28 mm	6.54	Live	2024-04-26	NO	/	/
PZ#79	TIL-79	FORLI	67	F				✔	YES	10.0	NO	/	NO	/	2024-03-13	LSD	squamous cell carcinoma	Keratinizing	IA2	T1b	N0	M0	G1	NO	NO	NO	NO	/	/	/	20 mm	8.14	Live	2024-04-19	NO	/	/

## Sheet: HD Clinical Table
Supplementary Table 1: Clinical characteristics of healthy donors. ICS; Intracellular Cell Staining. Helper; assay to detect helper cytokines.
Sample_ID	File name	Age (y)	Sex	ICS	Helper	Hypoxic assay	Comorbidities
MIDDLE_18	HD_1	81	F	x		x	None
VACHC29	HD_2	71	F	x		x	None
MIDDLE_10	HD_3	74	M	x	x	x	Hypertension, hypercholesterolemia, Transluminal Percutaneous Coronary Angioplasty
VACHC32	HD_4	72	M	x	x	x	None
HD_GHRD	HD_5	79	F	x		x	None
MIDDLE_19	HD_6	68	F	x	x	x	Tachycardia, ospteoporosis
MIDDLE_20	HD_7	80	M	x		x	Spinal stenosis
MIDDLE_17	HD_8	70	M	x	x		Hypertension, hypogammaglobulinemia
VACHC22	HD_9	57	F	x		x	None
COVID-114-G	HD_10	69	M		x		None
MIDDLE-12	HD_11	71	M		x		Hypertension, hypercholesterolemia
COVID-28-G	HD_12	63	M		x		None
COVID-390-G	HD_13	67	M		x		None
VACHC14	HD_14	67	F		x		None
VACHC18	HD_15	65	F		x		None
VACHC10	HD_16	57	F		x		None

## Sheet: Summary HD
Summary of clinical characteristics of healthy donors.
Healthy donors (n = 16)
Age (y) (±SD)	69.44 (± 7.09)
Sex (no.); %
Female	8.0 (50.0)
Male	8.0 (50.0)
Comorbidites
Hypertension	3.0 (18.8)
Other	2.0 (12.5)
None	11.0 (68.7)
