# Supplementary material for: Metabolically activated and highly polyfunctional intratumoral VISTA+ regulatory B cells are associated with tumor recurrence in early-stage NSCLC
Source: Springer Nature journal article supplement (doi:10.1186/s12943-024-02209-2), 2025-01-14
Supplement: MOESM3 [file 12943_2024_2209_MOESM3_ESM.docx]

**Supplementary Table 2. List of antibodies used in flow cytometry and mass cytometry (CyTOF) panels.**

| Target | Dye | Clone | Manufacturer | Cat. # | Lot. # | Titer (ml) /100ml | Panel |
| --- | --- | --- | --- | --- | --- | --- | --- |
| PromoFluor840 | Maleimide | N/A | Promocell | PK-PF840-3- 01 | / | 0.3 | T panel |
| CD45 | AF790 | 998209 | Biotechne R&D | MAB14301-100 | custom | 2 | T panel |
| CD226 (DNAM-1) | FITC | 11A8 | Biolegend | 338304 | B343014 | 0.625 | T panel |
| CD39 | PE-dazzle | A1 | Biolegend | 328224 | B280874 | 1.25 | T panel |
| CTLA-4 | BB700 | BNI3 | BD | 566902 | 1071437 | 1.25 | T panel |
| CD96 | PE | NK92.39 | Biolegend | 338406 | B285997 | 1.25 | T panel |
| CD8 | AF594 | RPA-T8 | Biolegend | 301056 | B335220 | 0.3 | T panel |
| CD69 | PC5 | TP1.55.3 | B. Coulter | IM2656 | 200058 | 10 | T panel |
| PD-1 | PC5.5 | PD1.3 | B. Coulter | B36123 | 200042 | 10 | T panel |
| CD4 | PC7 | SFCI12T4D11 | B. Coulter | 737660 | 7975084 | 10 | T panel |
| CD161 | AF647 | HP-3410 | Biolegend | 339910 | B282421 | 1.25 | T panel |
| CD45RA | AF700 | 2H4 | B. Coulter | B90396 | 200026 | 10 | T panel |
| CD3 | APC-AF7500 | UCHT1 | B. Coulter | A94680 | 200093 | 10 | T panel |
| Ki-67 | BUV395 | B56 | BD | 564071 | 1102682 | 2.5 | T panel |
| CD49a | BUV496 | SR84 | BD | 750629 | 1187992 | 2.5 | T panel |
| CD103 | BUV661 | Ber-ACT8 | BD | 749993 | 1187987 | 0.3 | T panel |
| GZMB | BV421 | QA18A18 | Biolegend | 396414 | B327961 | 1.25 | T panel |
| PSGL-1 | BV510 | KPL-1 | BD | 743479 | 2041205 | 0.625 | T panel |
| CXCR6 | BV605 | 13B1E5 | BD | 743599 | 1342512 | 2.5 | T panel |
| CCR7 | BV650 | G043H7 | Biolegend | 353234 | B340645 | 2.5 | T panel |
| T-BET | BV785 | 4B10 | Biolegend | 644835 | B308984 | 2.5 | T panel |
|  |  |  |  |  |  |  |  |
| Target | **Dye** | **Clone** | **Manufacturer** | **Cat. #** | **Lot. #** | **Titer (ml) /100ml** | **Panel** |
| PromoFluor840 | Maleimide | N/A | Promocell | PK-PF840-3- 01 | / | 0.3 | B panel |
| IgD | FITC | / | B. Coulter | DURACLONE (B53318) | 091220_36 | lyophilized | B panel |
| CD19 | ECD | / | B. Coulter | DURACLONE (B53318) | 091220_36 | lyophilized | B panel |
| CD27 | PC7 | / | B. Coulter | DURACLONE (B53318) | 091220_36 | lyophilized | B panel |
| CD24 | APC | / | B. Coulter | DURACLONE (B53318) | 091220_36 | lyophilized | B panel |
| CD21 | PE | / | B. Coulter | DURACLONE (B53318) | 091220_36 | lyophilized | B panel |
| CD38 | APC_AF750 | / | B. Coulter | DURACLONE (B53318) | 091220_36 | lyophilized | B panel |
| IgM | PB | / | B. Coulter | DURACLONE (B53318) | 091220_36 | lyophilized | B panel |
| CD45 | KrO | / | B. Coulter | DURACLONE (B53318) | 091220_36 | lyophilized | B panel |
| IL-10 | BB700 | JES3-19F1 | BD | 566567 | 1125446 | 2.5 | B panel |
| CD138 | APC_700 | MI15 | BD | 566050 | 1260256 | 2.5 | B panel |
| Ki-67 | BUV395 | B56 | BD | 564071 | 1110829 | 2.5 | B panel |
| CD49b | BUV496 | AK-7 | BD | 750069 | 3046639 | 1.25 | B panel |
| VISTA | BUV661 | MIH65.rMAb | BD | 750502 | 3046643 | 2.5 | B panel |
| CD73 | BV605 | AD2 | BD | 563199 | 2143770 | 2.5 | B panel |
| CXCR5 | BV650 | SKII.4 | BD | 748275 | 2130001 | 1.25 | B panel |
| HLA-DR | BV785 | L243 | Biolegend | 307642 | B343581 | 1.25 | B panel |
|  |  |  |  |  |  |  |  |
| Target | **Dye** | **Clone** | **Manufacturer** | **Cat. #** | **Lot. #** | **Titer (ml) /100ml** | **Panel** |
|  |  |  |  |  |  |  |  |
| PromoFluor840 | Maleimide | N/A | Promocell | PK-PF840-3- 01 | / | 0.3 | T_ICS |
| CD45 | AF790 | 998209 | Biotechne R&D | MAB14301-100 | custom | 1 | T_ICS |
| CD3 | PE-CY5 | UCHT1 | Biolegend | 300410 | B313350 | 0.6 | T_ICS |
| CD8 | APC-CY7 | RPA-T8 | Biolegend | 301016 | B274260 | 0.6 | T_ICS |
| CD103 | BUV661 | Ber-ACT8 | BD | 749993 | 1187987 | 0.3 | T_ICS |
| PSGL-1 | BV510 | KPL-1 | BD | 743479 | 2041205 | 0.6 | T_ICS |
| CD4 | AF700 | RPA-T4 | Biolegend | 300526 | B274110 | 1.25 | T_ICS |
| IL-2 | APC | MQ1-17H12 | Biolegend | 500310 | B335968 | 2.5 | T_ICS |
| IFN-γ | FITC | B27 | Biolegend | 506504 | B286029 | 2.5 | T_ICS |
| FoxP3 | BB700 | 236A/E7 | BD | 566526 | 2004689 | 5 | T_ICS |
| TNF | BV605 | Mab11 | Biolegend | 502936 | B327946 | 3.75 | T_ICS |
| GZMB | BV421 | QA18A28 | Biolegend | 396414 | B355194 | 2.5 | T_ICS |
| IL-17 | PE-CY7 | BL168 | Biolegend | 512315 | B325831 | 3.75 | T_ICS |
| GNLY | PE | DH2 | Biolegend | 348004 | B346917 | 2.5 | T_ICS |
|  |  |  |  |  |  |  |  |
| Target | **Dye** | **Clone** | **Manufacturer** | **Cat. #** | **Lot. #** | **Titer (ml) /100ml** | **Panel** |
| PromoFluor840 | Maleimide | N/A | Promocell | PK-PF840-3- 01 | / | 0.3 | B_ICS |
| CD19 | APC | HIB19 | Biolegend | 302212 | B350378 | 2 | B_ICS |
| CD45 | AF700 | HI30 | BD | 560566 | 1263352 | 2 | B_ICS |
| VISTA | BUV661 | MIH65.rMAb | BD | 750502 | 2096005 | 2.5 | B_ICS |
| GM-CSF | PE | BVD2-21C11 | Biolegend | 502306 | B391697 | 2.5 | B_ICS |
| IL-6 | PE-CY7 | MQ2-13A5 | Biolegend | 501120 | B347203 | 5 | B_ICS |
| TGF-β | BV421 | TW4-9ET | Biolegend | 562962 | 2297795 | 1.25 | B_ICS |
| TNF | BV605 | Mab11 | Biolegend | 502936 | B327946 | 3.75 | B_ICS |
| IL-10 | BB700 | JES3-19F1 | BD | 566567 | 1125446 | 2.5 | B_ICS |
| IFN-γ | FITC | B27 | Biolegend | 506504 | B286029 | 2.5 | B_ICS |

| Target | Dye | Clone | Manufacturer | Cat. # | Lot. # | Titer (ml) /100ml | Panel |
| --- | --- | --- | --- | --- | --- | --- | --- |
| Live Dead | Aqua | N/A | ThermoFisher | L34966 | 2268307 | 1.25 | Sorting |
| CD19 | APC | HIB19 | Biolegend | 302212 | B350378 | 5 | Sorting |

| Target | Dye | Clone | Manufacturer | Cat. # | Lot. # | Titer (ml) /100ml | Panel |
| --- | --- | --- | --- | --- | --- | --- | --- |
| Live Dead | Aqua | N/A | ThermoFisher | L34966 | 2268307 | 1.25 | Hypoxia |
| CD19 | APC | HIB19 | Biolegend | 302212 | B350378 | 2 | Hypoxia |
| VISTA | BV421 | MIH65.rMAb | BD | 566750 | 1274241 | 2.5 | Hypoxia |
| IL-10 | BB700 | JES3-19F1 | BD | 566567 | 1125446 | 2.5 | Hypoxia |

| Target | Metal | Clone | Manufacturer | Cat. # | Lot. # | Titer (ml) /100ml | Panel |
| --- | --- | --- | --- | --- | --- | --- | --- |
| Cell-ID Cisplatin | 195Pt | / | St. Biotools | 201195 | 2203477-08 | 0.5 | CyTOF |
| Cell-ID Intercalator | 191&193Ir | / | St. Biotools | 201192A | 2204312-27 | * | CyTOF |
| CD3 | 141Pr | UCHT1 | St. Biotools | 3141019B | 2112251-08 | 1 | CyTOF |
| CD4 | 106Cd | RPA-T4 | Biolegend | 300502 | custom | 1 | CyTOF |
| CD8a | 111Cd | RPA-T8 | Biolegend | 301002 | custom | 1 | CyTOF |
| CD45 | 89Y | HI30 | St. Biotools | 3089003B | 2208767-16 | 1 | CyTOF |
| CD69 | 162Dy | FN50 | St. Biotools | 3162001B | 2112484-22 | 1 | CyTOF |
| CD103 | 150Nd | Ber-ACT8 | Biolegend | 350202 | custom | 1 | CyTOF |
| CD39 | 172Yb | A1 | Biolegend | 328202 | custom | 1 | CyTOF |
| CD161 | 158Gd | HP-3G10 | Biolegend | 339902 | custom | 1 | CyTOF |
| PSGL-1 | 163Dy | KPL-1 | Biolegend | 328802 | custom | 1 | CyTOF |
| CXCR6 | 160Gd | K041E5 | St. Biotools | 3160016B | 1322018 | 1 | CyTOF |
| CXCL13 | 175Lu | 53610 | ThermoFisher | MA5-23832 | custom | 1 | CyTOF |
| TCF1 | 110Cd | 7F11A10 | Biolegend | 655202 | custom | 1 | CyTOF |
| PD-1 | 155Gd | EH12.2H7 | St. Biotools | 3155009B | 2206216-29 | 1 | CyTOF |
| ICOS | 143Nd | C398.4A | St. Biotools | 3143025B | 2209461-29 | 1 | CyTOF |
| FoxP3 | 171Yb | PCH101 | ThermoFisher | 14-4776-82 | custom | 1 | CyTOF |
| CD19 | 142Nd | HIB19 | St. Biotools | 3142001B | 2203508-10 | 1 | CyTOF |
| IL-10 | 167Er | JES3-9D7 | Biolegend | 501423 | custom | 1 | CyTOF |
| VISTA | 176Yb | A17002B | Biolegend | 378102 | custom | 1 | CyTOF |
| CD73 | 168Er | AD2 | Biolegend | 344002 | custom | 1 | CyTOF |
| CD49b | 174Yb | 9F10 | Biolegend | 359302 | custom | 1 | CyTOF |
| CD38 | 144Nd | HIT2 | St. Biotools | 3144014B | 2203499-09 | 1 | CyTOF |
| Ki-67 | 161Dy | B56 | St. Biotools | 3161007B | 2202239-18 | 1 | CyTOF |
| GLUT1 | 164Dy | EPR3915 | Abcam | ab196357 | custom | 1 | CyTOF |
| HK2 | 166Er | EPR20839 | Abcam | ab228819 | custom | 1 | CyTOF |
| GAPDH | 112Cd | 6C5 | ThermoFisher | AM4300 | custom | 1 | CyTOF |
| LDHA | 114Cd | EP1566Y | Abcam | ab219591 | custom | 1 | CyTOF |
| G6PD | 156Gd | EPR20668 | Abcam | ab231828 | custom | 1 | CyTOF |
| PFKB4 | 149Sm | PA528648 | ThermoFisher | PA5-28648 | custom | 1 | CyTOF |
| CytC | 145Nd | 6H2.B4 | Biolegend | 612302 | custom | 1 | CyTOF |
| CS | 146Nd | EPR8067 | Abcam | ab233838 | custom | 1 | CyTOF |
| IDH1 | 170Er | 843219 | Novus | MAB7049 | custom | 1 | CyTOF |
| ATPA5 | 153Eu | 15H4C4 | Abcam | ab14748 | custom | 1 | CyTOF |
| CD98 | 159Tb | UM7F8 | St. Biotools | 3159022B | 1551501 | 1 | CyTOF |
| GLUD 1/2 | 169Tm | D9F7P | CST | 12793S | custom | 1 | CyTOF |
| CD36 | 152Sm | 5-271 | St. Biotools | 3155012B | 1151904 | 1 | CyTOF |
| CPT1A | 173Yb | 8F6AE9 | Abcam | ab128568 | custom | 1 | CyTOF |
| ACC_p | 151Eu | D7D11 | CST | 11818S | custom | 1 | CyTOF |
| HIF1a | 148Nd | 700505 | ThermoFisher | 16H4L13 | custom | 1 | CyTOF |
| NRF2_p | 116Cd | EP1809Y | Abcam | ab180844 | custom | 1 | CyTOF |
| VDAC1 | 154Sm | 20B12AF2 | Abcam | ab14734 | custom | 1 | CyTOF |
| PGC1a_p | 165Ho | Polyclonal | R&D | AF6650 | custom | 1 | CyTOF |

| Target | Dye | Clone | Manufacturer | Cat. # | Lot. # | Titer (ml) /100ml | Panel |
| --- | --- | --- | --- | --- | --- | --- | --- |
| PromoFluor840 | Maleimide | N/A | Promocell | PK-PF840-3- 01 | / | 0.3 | Helper |
| CD3 | PE-CY5 | UCHT1 | Biolegend | 300410 | B354022 | 0.6 | Helper |
| CD4 | AF700 | RPA-T4 | Biolegend | 300526 | B368193 | 1.25 | Helper |
| CD8 | APC-CY7 | RPA-T8 | Biolegend | 301016 | B351506 | 0.6 | Helper |
| CD45 | BUV395 | HI30 | BD | 563792 | 3268377 | 2.0 | Helper |
| CD103 | BUV661 | Ber-ACT8 | BD | 749993 | 4180671 | 0.3 | Helper |
| PSGL-1 | BV510 | KPL-1 | BD | 743479 | 4187837 | 0.6 | Helper |
| CXCR5 | BV650 | RF8B2 | BD | 740828 | 3079596 | 1.25 | Helper |
| PD-1 | BV605 | EH12.2H7 | Biolegend | 329924 | B238715 | 2.5 | Helper |
| IL-4 | APC | MP4-25D2 | Biolegend | 500812 | B356785 | 2.5 | Helper |
| IL-22 | AF488 | MH22B2 | BD | 567553 | 1302730 | 2.5 | Helper |
| FoxP3 | BB700 | 236A/E7 | BD | 566526 | 4094738 | 5 | Helper |
| TGF-β | BV421 | TW4-9E7 | BD | 562962 | 2297795 | 1.25 | Helper |
| IL-21 | PE | 3A3-N2 | Biolegend | 513004 | B392329 | 2.5 | Helper |
| IL-9 | PE-CY7 | MH9A4 | Biolegend | 507612 | B378542 | 2.5 | Helper |

CyTOF assay: Cytometry by time of flight (mass cytometry)
ICS: Intracellular Cytokine Staining

Helper: panel to measure helper cytokine

*: 1ul of intercalator in 1ml of perm buffer as reported within the St. Biotools protocol
